# Supplementary material
Source: Springer Nature journal article supplement (https://www.springermedizin.de/resource/supplementary/12881_2011_869_MOESM2_ESM.pdf/9451258)

**A**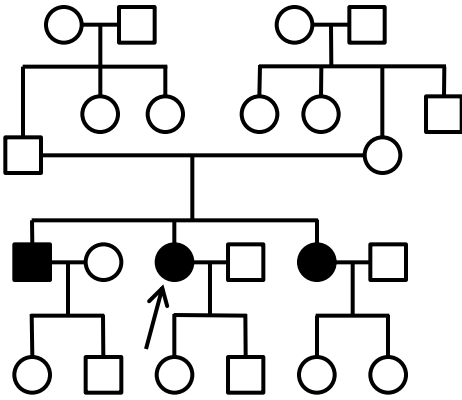**B**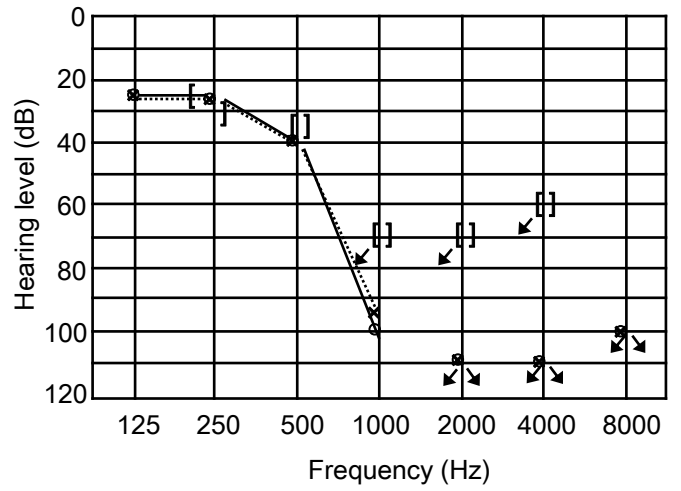**C**

12S rRNA

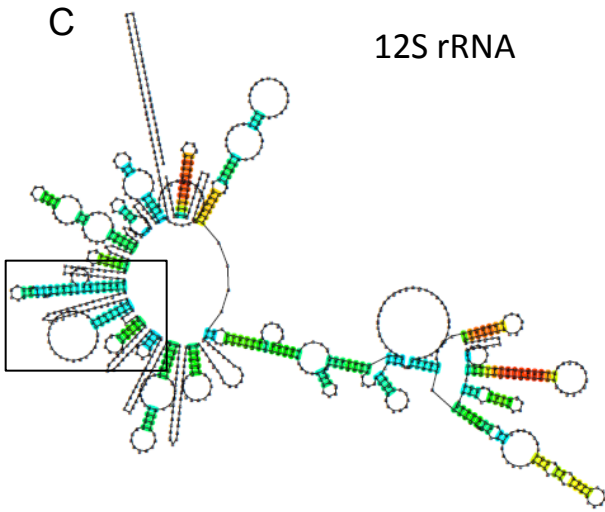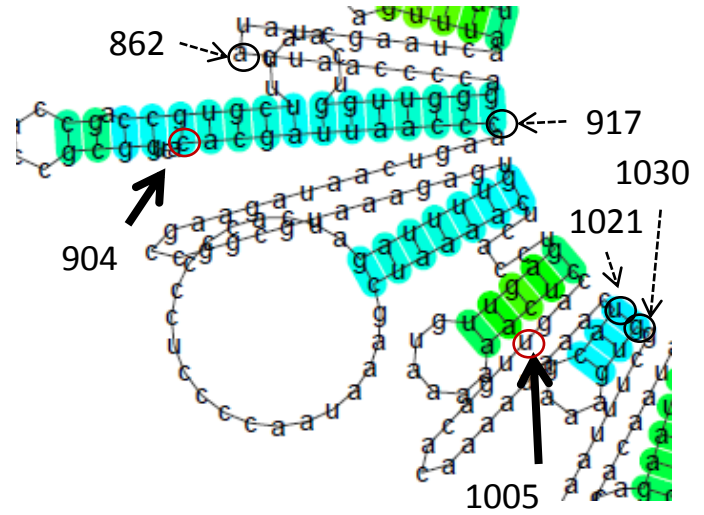**D**12S rRNA  
904C > T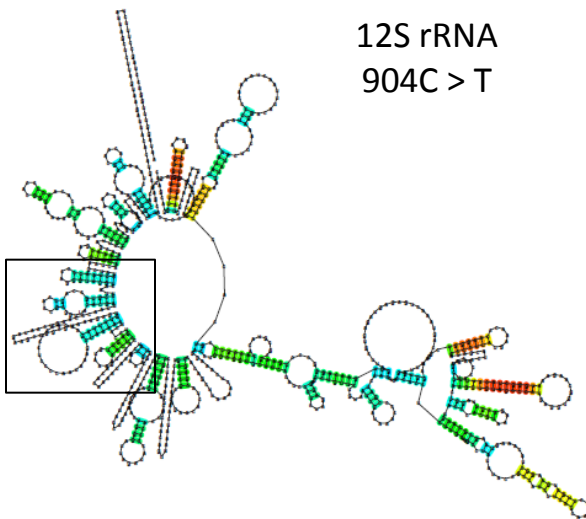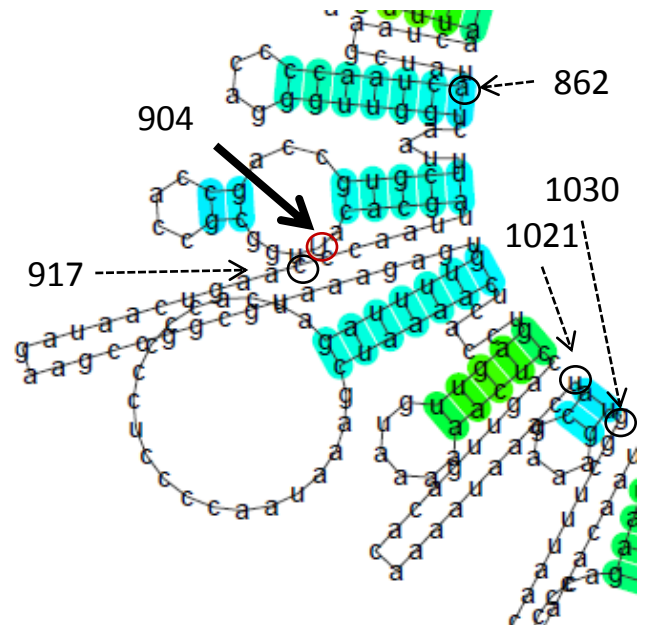

Supplement: MOESM2 [file 9451258]
